# Supplementary figures and images for: Cognitive-Behavioral Therapy for Depression in Parkinson's Disease: A Randomized, Controlled Trial
Source: Atypon-hosted journal article supplement (doi:10.1176/appi.ajp.2011.10111669), 2011-06-16

Figure 1. CONSORT Diagram

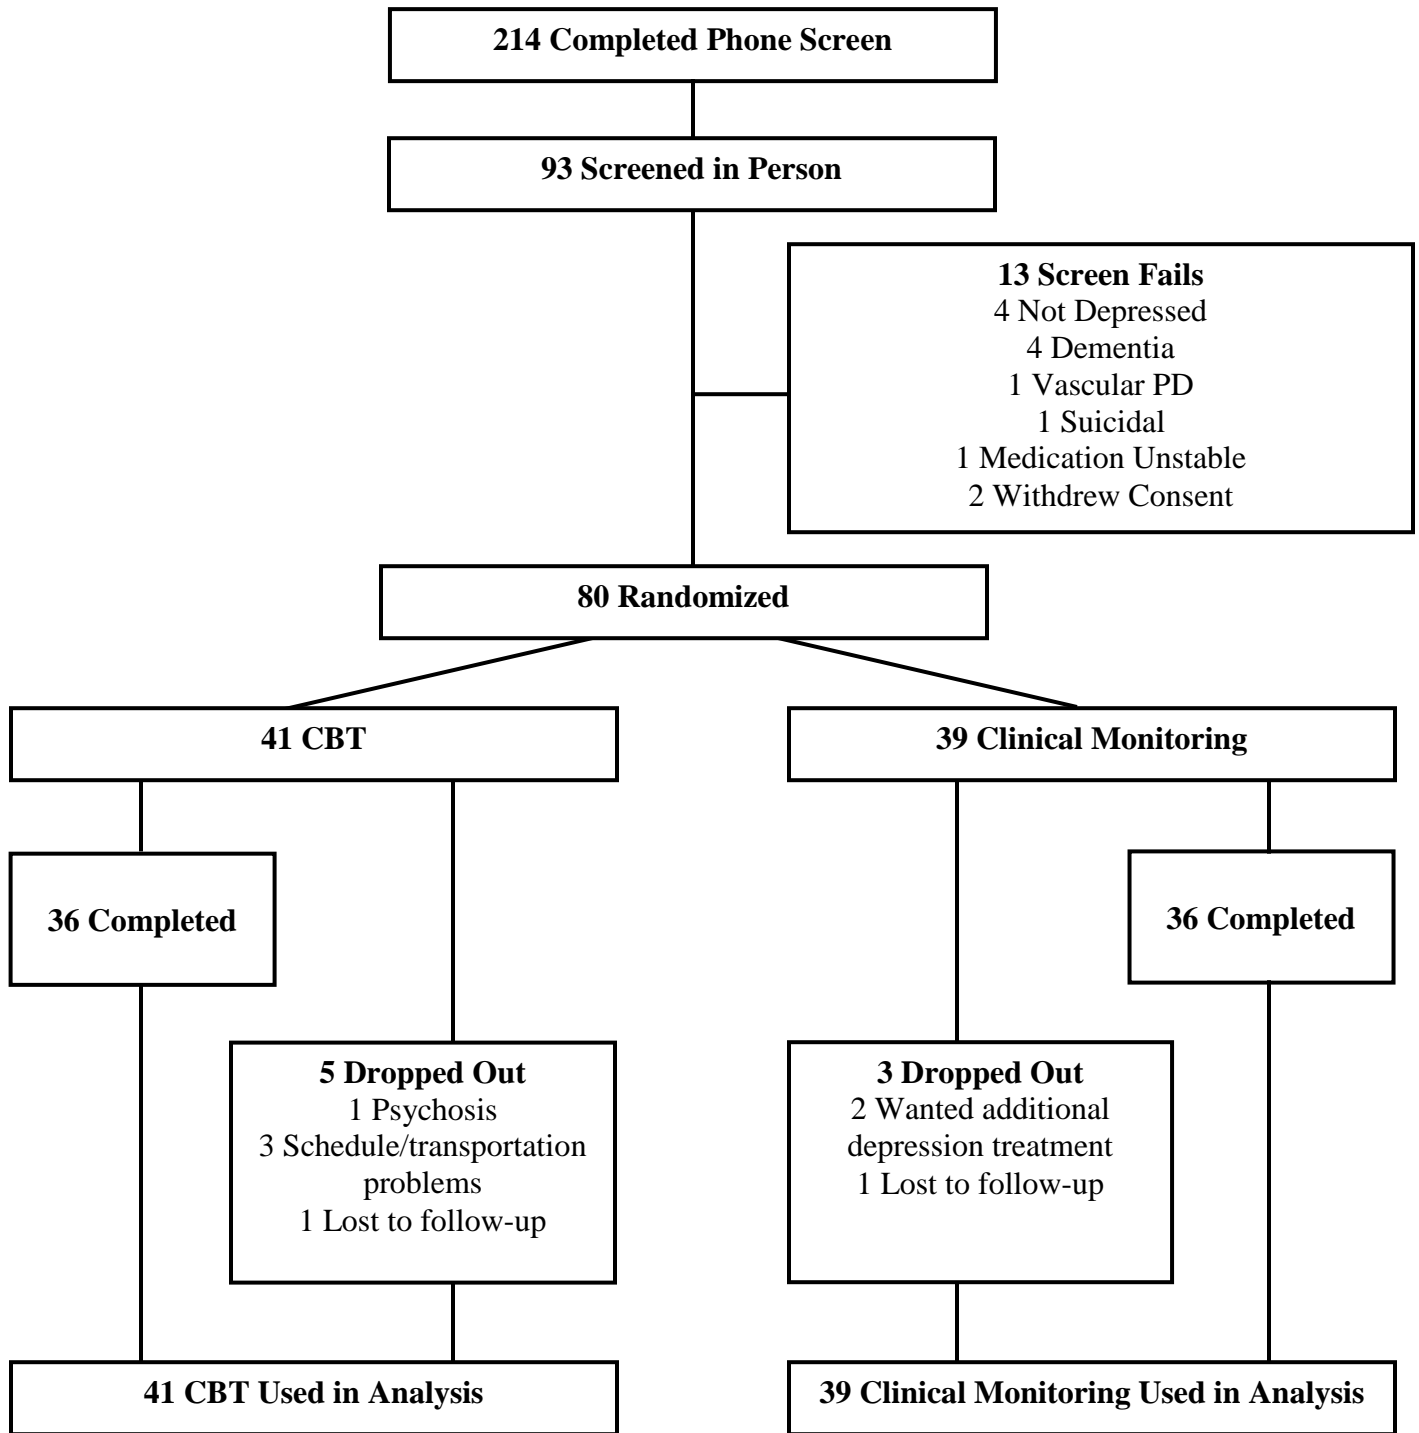

Supplement: ajp_168_10_1066_02.pdf [file ajp_168_10_1066_02.pdf]
